# Supplementary material
Source: JCI journal article supplement (doi:10.1172/jci198810)
Supplement: sd1 [file 1]

1 **Supplementary Figures**

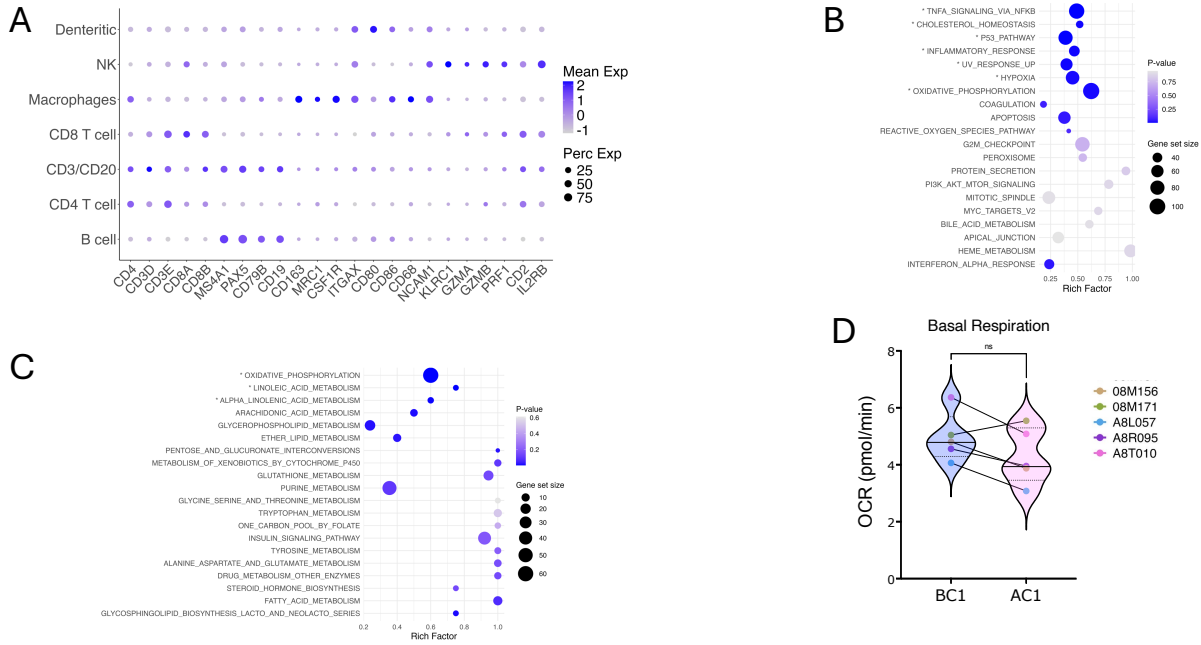

2 **Figure S1. Gene expression data used for annotation of lymph node clusters and basal**  
 3 **respiration before and after galunisertib. A) Bubble plot showing expression (mean normalized**  
 4 **and Z-scaled counts proportional to the color; size proportional to the percentage of cells) of**  
 5 **markers used for canonical annotation of major immune cell subsets. B-C) Bubble plot version of**  
 6 **GSEA analysis data for Hallmark (B) and metabolic Kegg (C) sets indicating the gene set size**  
 7 **(size of the bubble) and the p-value (intensity of color) from Figure 1. D) Basal oxygen**  
 8 **consumption rates of sorted CD4<sup>+</sup> T cells before (BC1) compared to after (AC1) the first 2-weeks**  
 9 **cycle with galunisertib for 5 macaques with enough stored cells for sorting as measured by**  
 10 **Seahorse.**

11

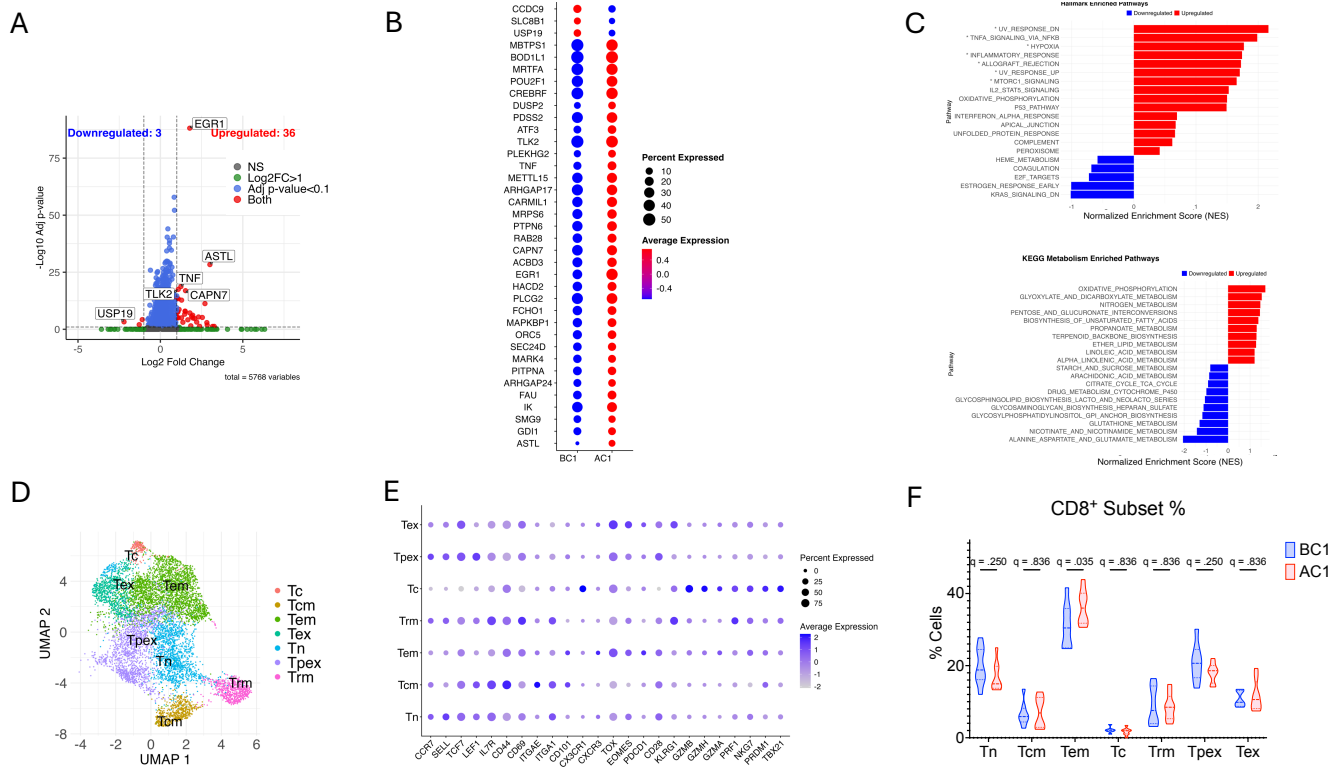

12

13 **Figure S2 Galunisertib upregulates inflammatory responses in lymph node CD8<sup>+</sup> T cells.**

14 A) Volcano plot showing differentially expressed genes (DEGs) from the comparison of lymph  
 15 nodes CD8<sup>+</sup> T cells before and after the first 2 weeks of galunisertib (cycle 1; BC1 vs AC1) by  
 16 MAST hurdle model. B) Bubble plot showing significant DEGs (B-H FDR adjusted \*q≤0.05 and  
 17 log<sub>2</sub>FC ≥1). C) Enriched Hallmark and KEGG metabolic pathways in total CD8<sup>+</sup> T cells based on  
 18 GSEA (BC1 vs. AC1). Upregulated pathways (red) and downregulated pathways (blue) are  
 19 shown with their respective NES (B-H FDR \*q≤0.1). D) UMAP projection of scRNA-seq data from  
 20 lymph node tissue, showing cluster annotation of distinct CD8<sup>+</sup> T cell subtypes based on E). E)  
 21 Bubble plot displaying the average normalized expression of selected markers used for CD8<sup>+</sup> T  
 22 cell annotation (mean normalized and Z-scaled counts proportional to the color; size proportional  
 23 to the percentage of cells). F) The frequencies of CD8<sup>+</sup> T cell subsets before (BC1) and after  
 24 (AC1) galunisertib are shown compared by mixed effect models and BH FDR correction.

25

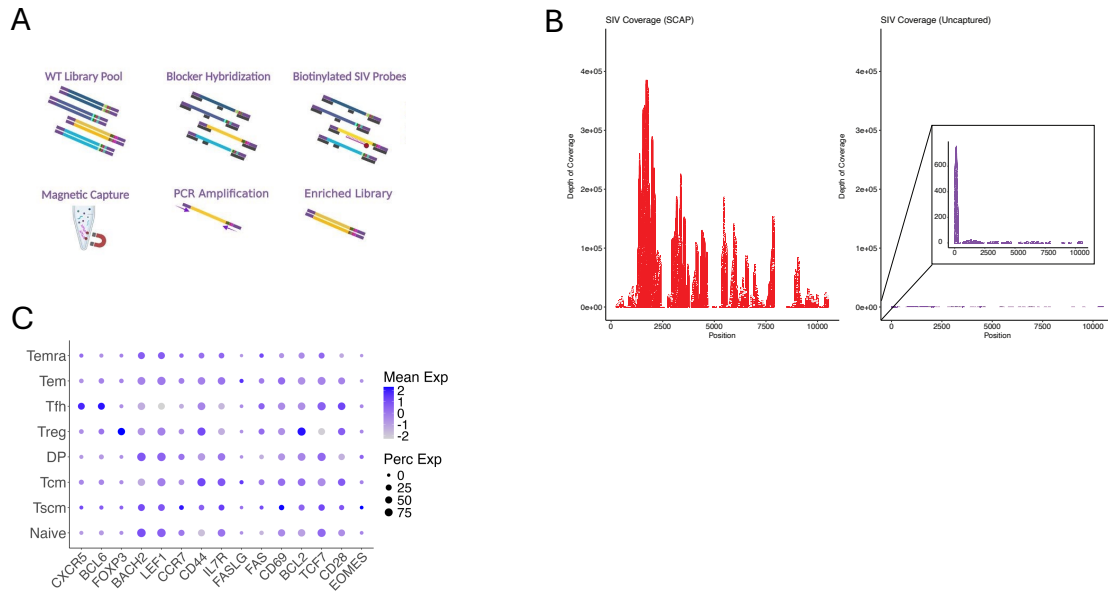

26

27 **Figure S3. SCAP workflow and SIV capture.** A) The workflow of SCAP using Parse  
 28 Biosciences technology gene select kit. Blocker hybridization decreased non-specific probe  
 29 binding, while 314 biotinylated SIV probes selectively captured viral RNA. Magnetic beads  
 30 isolated these sequences, followed by PCR amplification and sequencing. B) Depth of coverage  
 31 of SIV-mapped sequences resulted from SCAP (left) and the uncaptured whole transcriptome  
 32 library for all samples. Reds obtained for each experiment were aligned to SIVmac239 reference  
 33 genome and the depth of coverage was quantified as the number of reads mapped per position.  
 34 C) Bubble plot displaying the average normalized expression of selected markers used for  
 35 annotation of CD4<sup>+</sup> T cell clusters is shown (mean normalized and Z-scaled counts proportional  
 36 to the color; size proportional to the percentage of cells).

37

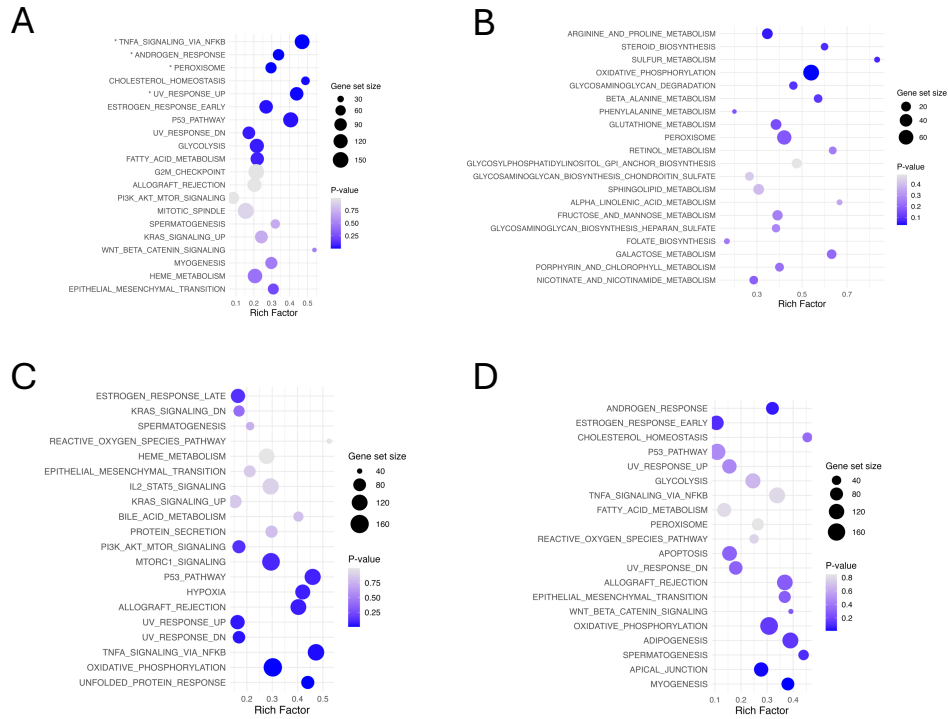

38

39 **Figure S4. Bubble plot versions of the GSEA analysis shown in Figures 3 and 4 with**  
 40 **indicated gene set size and p-values.**

41

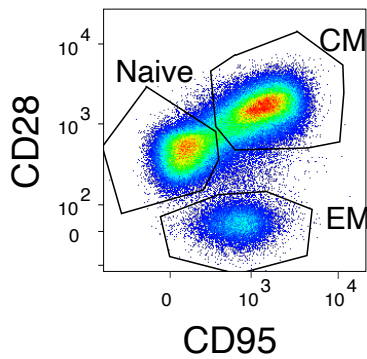

42 **Figure S5. Gating strategy of CD4 T cell subsets used for comparisons of transcription**  
 43 **factors.** Live lymphocytes were gated within CD3<sup>+</sup> CD4<sup>+</sup> cells and then as above for Figure 6 and  
 44 **Figure S6 data.**

45

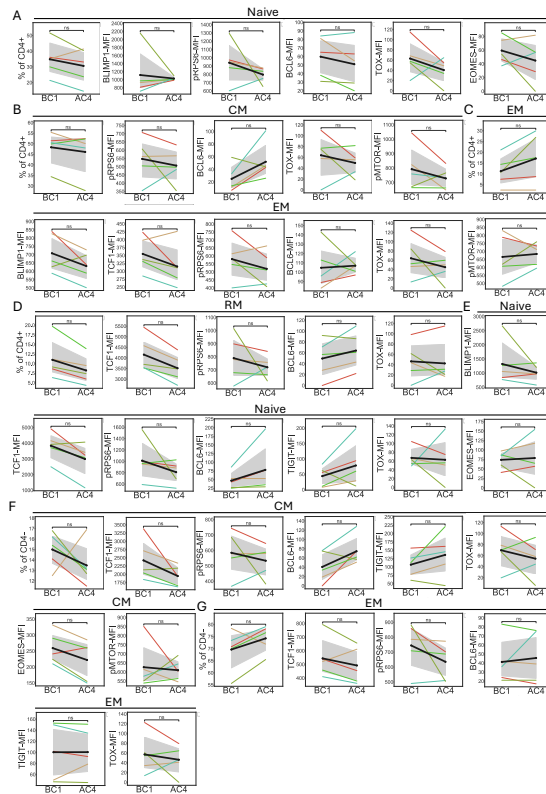

47

48 **Figure S6 Transcription factors not altered in blood T cells by galunisertib treatment.** Line  
 49 plots showing non significantly (BH-FDR $q > 0.05$ ) altered transcription factors expression (MFI) in  
 50 CD4<sup>+</sup> (A-D) and CD8<sup>+</sup> (CD4<sup>-</sup>; E-G) T cell subsets before (BC1) galunisertib compared to after the  
 51 four galunisertib cycles (AC4= after cycle 4). CM= central memory, EM= effector memory, and  
 52 RM= resting memory.

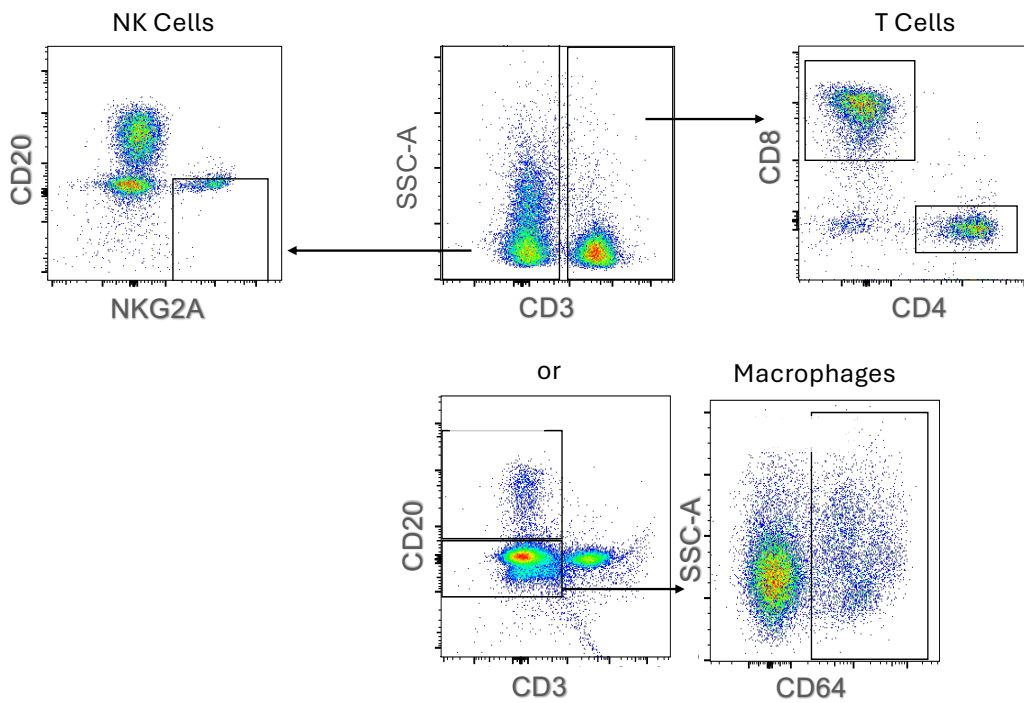

53

54 **Figure S7 Gating strategy for colorectal tissue cells.** Live mononuclear cells isolated from  
 55 colorectal biopsies before and after 4 cycles of galunisertib were gated as shown before each  
 56 subset was analyzed with the high dimensional pipeline described in the methods.

57

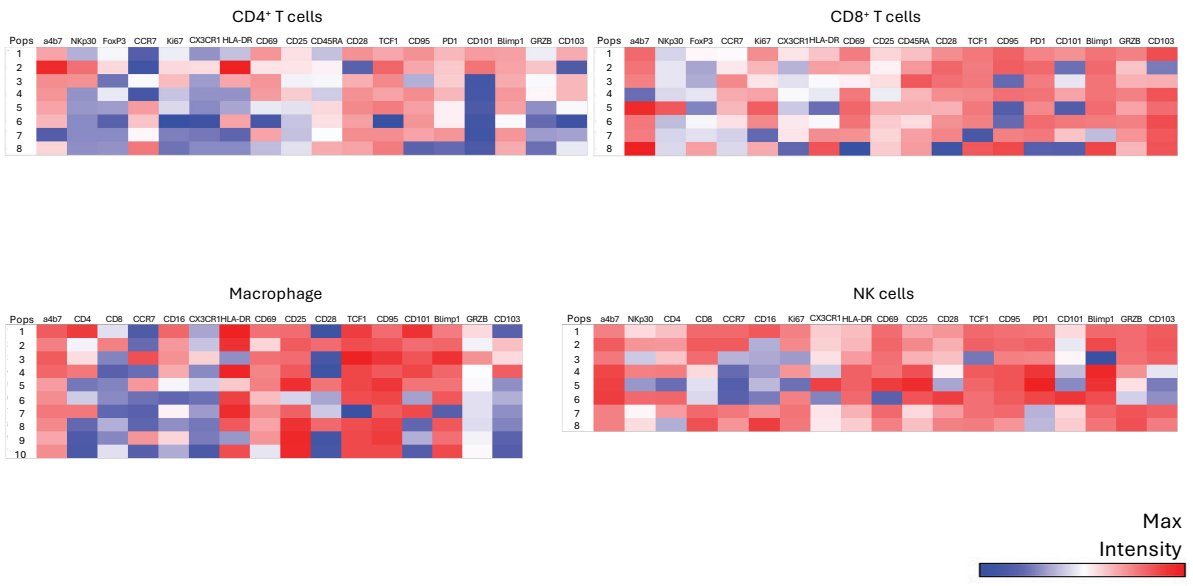

58 **Figure S8 Heatmaps of rectal biopsy cell populations generated by FlowSOM.** FlowSOM  
 59 was run with Phenograph's suggested numbers of clusters on cleaned, live, singlet populations  
 60 gated as shown in Figure S5 from BC1 and AC4 data (before compared to after all four  
 61 galunisertib cycles). Heatmap of Z-scaled MFI for each marker in each FlowSOM population is  
 62 shown.  
 63

64 **Table S1** List of Metabolism-Associated Pathways Obtained from the C2 CP: KEGG

## 65 Subcategory

|     |                                                               |
|-----|---------------------------------------------------------------|
| 1.  | KEGG_ALANINE_ASPARTATE_AND_Glutamate_Metabolism               |
| 2.  | KEGG_ALPHA_Linolenic_Acid_Metabolism                          |
| 3.  | KEGG_Amino_Sugar_And_Nucleotide_Sugar_Metabolism              |
| 4.  | KEGG_Arachidonic_Acid_Metabolism                              |
| 5.  | KEGG_Arginine_And_Proline_Metabolism                          |
| 6.  | KEGG_Ascorbate_And_Aldarate_Metabolism                        |
| 7.  | KEGG_Beta_Alanine_Metabolism                                  |
| 8.  | KEGG_Biosynthesis_Of_Unsaturated_Fatty_Acids                  |
| 9.  | KEGG_Butanoate_Metabolism                                     |
| 10. | KEGG_Citrate_Cycle_TCA_Cycle                                  |
| 11. | KEGG_Cysteine_And_Methionine_Metabolism                       |
| 12. | KEGG_Drug_Metabolism_Cytochrome_P450                          |
| 13. | KEGG_Drug_Metabolism_Other_Enzymes                            |
| 14. | KEGG_Ether_Lipid_Metabolism                                   |
| 15. | KEGG_Fatty_Acid_Metabolism                                    |
| 16. | KEGG_Folate_Biosynthesis                                      |
| 17. | KEGG_Fructose_And_Mannose_Metabolism                          |
| 18. | KEGG_Galactose_Metabolism                                     |
| 19. | KEGG_Glutathione_Metabolism                                   |
| 20. | KEGG_Glycerolipid_Metabolism                                  |
| 21. | KEGG_Glycerophospholipid_Metabolism                           |
| 22. | KEGG_Glycine_Serine_And_Threonine_Metabolism                  |
| 23. | KEGG_Glycolysis_Gluconeogenesis                               |
| 24. | KEGG_Glycosaminoglycan_Biosynthesis_Chondroitin_Sulfate       |
| 25. | KEGG_Glycosaminoglycan_Biosynthesis_Heparan_Sulfate           |
| 26. | KEGG_Glycosaminoglycan_Biosynthesis_Keratan_Sulfate           |
| 27. | KEGG_Glycosaminoglycan_Degradation                            |
| 28. | KEGG_Glycosphingolipid_Biosynthesis_Ganglio_Series            |
| 29. | KEGG_Glycosphingolipid_Biosynthesis_Globo_Series              |
| 30. | KEGG_Glycosphingolipid_Biosynthesis_Lacto_And_Neolacto_Series |
| 31. | KEGG_Glycosylphosphatidylinositol_GPI_Anchor_Biosynthesis     |
| 32. | KEGG_Glyoxylate_And_Dicarboxylate_Metabolism                  |
| 33. | KEGG_Inositol_Phosphate_Metabolism                            |
| 34. | KEGG_Insulin_Signaling_Pathway                                |
| 35. | KEGG_Limonene_And_Pinene_Degradation                          |
| 36. | KEGG_Linoleic_Acid_Metabolism                                 |
| 37. | KEGG_Lysine_Degradation                                       |
| 38. | KEGG_Metabolism_Of_Xenobiotics_By_Cytochrome_P450             |
| 39. | KEGG_Nicotinate_And_Nicotinamide_Metabolism                   |
| 40. | KEGG_Nitrogen_Metabolism                                      |
| 41. | KEGG_One_Carbon_Pool_By_Folate                                |
| 42. | KEGG_Oxidative_Phosphorylation                                |
| 43. | KEGG_Pantothenate_And_CoA_Biosynthesis                        |
| 44. | KEGG_Pentose_And_Glucuronate_Interconversions                 |
| 45. | KEGG_Pentose_Phosphate_Pathway                                |
| 46. | KEGG_Peroxisome                                               |
| 47. | KEGG_Phenylalanine_Metabolism                                 |
| 48. | KEGG_Porphyrin_And_Chlorophyll_Metabolism                     |
| 49. | KEGG_Propanoate_Metabolism                                    |
| 50. | KEGG_Purine_Metabolism                                        |
| 51. | KEGG_Pyrimidine_Metabolism                                    |
| 52. | KEGG_Pyruvate_Metabolism                                      |
| 53. | KEGG_Retinol_Metabolism                                       |
| 54. | KEGG_Riboflavin_Metabolism                                    |
| 55. | KEGG_Selenoamino_Acid_Metabolism                              |
| 56. | KEGG_Sphingolipid_Metabolism                                  |
| 57. | KEGG_Starch_And_Sucrose_Metabolism                            |
| 58. | KEGG_Steroid_Biosynthesis                                     |

|     |                                                 |
|-----|-------------------------------------------------|
| 59. | KEGG_STEROID_HORMONE_BIOSYNTHESIS               |
| 60. | KEGG_SULFUR_METABOLISM                          |
| 61. | KEGG_TAURINE_AND_HYPOTAURINE_METABOLISM         |
| 62. | KEGG_TERPENOID_BACKBONE_BIOSYNTHESIS            |
| 63. | KEGG_TRYPTOPHAN_METABOLISM                      |
| 64. | KEGG_TYROSINE_METABOLISM                        |
| 65. | KEGG_VALINE_LEUCINE_AND_ISOLEUCINE_BIOSYNTHESIS |
| 66. | KEGG_VALINE_LEUCINE_AND_ISOLEUCINE_DEGRADATION  |

66

67

**Table S2** List of Genes Involved in Mitochondrial Biosynthesis and Modulation

| <b>Mitochondrial biogenesis regulators:</b> |                                                                    |
|---------------------------------------------|--------------------------------------------------------------------|
| PPARGC1A (PGC1 $\alpha$ )                   | Master regulator of mitochondrial expansion                        |
| PPARGC1B (PGC1 $\beta$ )                    | Supports biogenesis                                                |
| NRF1                                        | Drives expression of respiratory genes                             |
| NFE2L2                                      | Drives expression of respiratory genes                             |
| GABPA                                       | Coordinates respiratory chain expression                           |
| TFAM                                        | Increases mtDNA replication and transcription                      |
| ESRRA                                       | Works with PGC1 $\alpha$ to increase mitochondrial gene expression |
| <b>Mitochondrial dynamics</b>               |                                                                    |
| OPA1                                        | Promotes fusion                                                    |
| DNM1L                                       | Decreases fission                                                  |
| FIS1                                        | Decreases fission                                                  |
| <b>Quality control</b>                      |                                                                    |
| PINK1                                       | Monitor mitochondrial health                                       |
| PRKN                                        | Maintain quality                                                   |
| BNIP3                                       | Increases to handle stress                                         |
| BNIP3L                                      | Increases to handle stress                                         |
| <b>Assembly factors</b>                     |                                                                    |
| COX10                                       | Needed for complex IV assembly                                     |
| COX16                                       | Needed for complex IV assembly                                     |
| NDUFAF1                                     | Needed for complex I assembly                                      |
| SDHAF1                                      | Needed for complex II assembly                                     |
| SDHAF2                                      | Needed for complex II assembly                                     |
| NDUFAF3                                     | Needed for complex I assembly                                      |
| NDUFAF4                                     | Needed for complex I assembly                                      |
| NDUFAF5                                     | Needed for complex I assembly                                      |
| NDUFAF7                                     | Needed for complex I assembly                                      |

70 **Table S3** List of Genes Used to Derive Cellular Quiescence Scores

| <b>Quiescence gene set</b> |
|----------------------------|
| CDKN1A                     |
| CDKN1B                     |
| BTG1                       |
| PTEN                       |
| TOB1                       |
| TSC1                       |
| TSC2                       |
| TBC1D7                     |
| STK11                      |
| FOXO1                      |
| FOXO3                      |
| FOXO4                      |
| KLF2                       |
| FOXP1                      |
| BACH2                      |
| SATB1                      |
| PDCD1                      |
| CTLA4                      |
| TIGIT                      |
| VSIR                       |
| STAT1                      |

71

72

73 **Table S4** List of Antibodies and Markers in the Transcription Factors Panel for PBMC

| <b>Marker</b> | <b>Color</b>   | <b>Clone</b> | <b>Cat numb</b> | <b>Maker</b> |
|---------------|----------------|--------------|-----------------|--------------|
| CD45RA        | APC-H7         | 5H9          | 561212          | BD           |
| CD3           | BUV805         | SP34-2       | 568354          | BD           |
| CD4           | BUV395         | L200         | 564107          | BD           |
| CD95          | BV605          | DX2          | 305628          | Biologend    |
| CD28          | FITC           | CD28.2       | 302906          | Biologend    |
| CD62L         | BV711          | SK11         | 565040          | BD           |
| TIGIT         | eFluo450/BV421 | MBSA43       | 48-9500-41      | Invitrogen   |
| BCL6          | BUV615         | K112-91      | 568060          | BD           |
| RPS6 Ser 244  | PCPCyanine5.5  | A18024A      | 935710          | Biologend    |
| TOX           | PE             | TXRX10       | 12-6502-82      | Invitrogen   |
| EOMES         | PE-eFluor610   | Dan11mag     | 61-4875-82      | Invitrogen   |
| pMTOR         | PE-Cyanine7    | MRRBY        | 25-9718-42      | Invitrogen   |
| TCF1          | Alexa Fluor647 | S33-966      | 566693          | BD           |
| BLIMP1        | R718           | 6D3          | 567764          | BD           |

74  
75

76 **Table S5** List of Antibodies and Markers in the Rectal Biopsies High-dimensional Spectral Panel

| Marker       | Color             | Clone     | Cat numb    | Maker         |
|--------------|-------------------|-----------|-------------|---------------|
| CD4          | BUV395            | L200      | 564107      | BD            |
| CD20         | BUV496            | 2H7       | 569672      | BD            |
| CD8          | BUV563            | RPA-T8    | 612914      | BD            |
| CD64         | BUV615            | 10.1      | 752365      | BD            |
| CCR7         | BUV661            | 2-L1-A    | 749824      | BD            |
| CD16         | BUV737            | 3G8       | 612786      | BD            |
| CD3          | BUV805            | SP34-2    | 568354      | BD            |
| CD103        | Super Bright™ 436 | B-Ly7     | 62-1038-42  | Biologend     |
| CX3CR1       | BV510             | 2A9-1     | 341622      | Biologend     |
| HLA-DR       | BV570             | L243      | 307638      | Biologend     |
| CD69         | BV605             | FN50      | 310938      | Biologend     |
| CD25         | BV650             | BC96      | 302634      | Biologend     |
| CD45         | BV711             | D058-1283 | 740809      | BD            |
| CD45RA       | BV750             | 5H9       | 747465      | BD            |
| CD62L        | BV786             | SK11      | 565311      | BD            |
| CD28         | FITC              | 28.2      | 302906      | Biologend     |
| CD101        | PCPCy5.5          | BB27      | 331016      | Biologend     |
| CD95         | PE-CF594          | DX2       | 305634      | Biologend     |
| PD-1 (CD279) | PE-Cy5            | eBioJ105  | 15-2799-42  | Thermo Fisher |
| a4b7         | APC               | Act-1     | NA          | NHP           |
| NKG2A        | PE-Vio770         | REA110    | 130-113-567 | Mylteny       |
| NKp30/CD337  | APC/Fire™ 750     | P30-15    | 325226      | Biologend     |
| Ki67         | BV480             | B56       | 566109      | BD            |
| FoxP3        | AF532             | PCH101    | 58-4776-42  | Thermo Fisher |
| GRZB         | RB780             | GB11      | 568705      | BD            |
| TCF-1        | PE                | S33-966   | 564217      | BD            |
| Blimp-1      | R718              | 6D3       | 567764      | BD            |

77  
78
